# Supplementary material
Source: PubMed Central journal article supplement (PMC6320220)
Supplement: NIHMS997200-supplement-Supplementary_Materials.pdf [file NIHMS997200-supplement-Supplementary_Materials.pdf]

## Supplementary Materials for

### **Evaluation of liquid from the Papanicolaou test and other liquid biopsies for the detection of endometrial and ovarian cancers**

Yuxuan Wang, Lu Li, Christopher Douville, Joshua D. Cohen, Ting-Tai Yen, Isaac Kinde, Karin Sundfelt, Susanne K. Kjær, Ralph H. Hruban, Ie-Ming Shih, Tian-Li Wang, Robert J. Kurman, Simeon Springer, Janine Ptak, Maria Popoli, Joy Schaefer, Natalie Silliman, Lisa Dobbryn, Edward J. Tanner, Ana Angarita, Maria Lycke, Kirsten Jochumsen, Bahman Afsari, Ludmila Danilova, Douglas A. Levine, Kris Jardon, Xing Zeng, Jocelyne Arseneau, Lili Fu, Luis A. Diaz Jr., Rachel Karchin, Cristian Tomasetti,\* Kenneth W. Kinzler,\* Bert Vogelstein,\* Amanda N. Fader,\* Lucy Gilbert,\* Nickolas Papadopoulos\*

\*Corresponding author. Email: lucy.gilbert@mcgill.ca (L.G.); afader1@jhmi.edu (A.N.F.); ctomasetti@jhu.edu (C.T.); kinzlake@jhmi.edu (K.W.K.); vogelbe@jhmi.edu (B.V.); npapado1@jhmi.edu (N.P.)

Published 21 March 2018, *Sci. Transl. Med.* **10**, eaap8793 (2018)  
DOI: 10.1126/scitranslmed.aap8793

**Other Supplementary Material for this manuscript includes the following:**  
(available at  
[www.sciencetranslationalmedicine.org/cgi/content/full/10/433/eaap8793/DC1](http://www.sciencetranslationalmedicine.org/cgi/content/full/10/433/eaap8793/DC1))

- Table S1 (Microsoft Excel format). Patient and tumor characteristics.
- Table S2 (Microsoft Excel format). Samples tested with PapSEEK for somatic mutations and aneuploidy.
- Table S3 (Microsoft Excel format). Genomic regions covered in multiplex assays for Pap and Tao brush samples.
- Table S4 (Microsoft Excel format). Mutations identified in Pap and Tao brush samples from patients with ovarian or endometrial cancer.
- Table S5 (Microsoft Excel format). Mutations identified in the primary tumors.
- Table S6 (Microsoft Excel format). Contingency tables for PapSEEK in patients with ovarian and endometrial cancers, as well as healthy controls.
- Table S7 (Microsoft Excel format). Mutations identified in the plasma of ovarian cancer patients.
